# Supplementary material for: Stationary and Progressive Phenotypes Caused by the p.G90D Mutation in Rhodopsin Gene
Source: MDPI journal article supplement (doi:10.3390/ijms22042133), 2021-02-21
Supplement: s1 [file s1]

**Table 1.** Clinical details of the patients harboring *RHO* p.G90D gathered from a previously published report [1].

| Patient ID | Sex | Age at the time of the study (years) | BCVA (Snellen) BE | Color vision | Problems with vision                                       | Fundus features                                                                 | Visual Field (Goldmann perimetry) | ERG                                                                                                                                                                                                                                                                                                                                               |
|------------|-----|--------------------------------------|-------------------|--------------|------------------------------------------------------------|---------------------------------------------------------------------------------|-----------------------------------|---------------------------------------------------------------------------------------------------------------------------------------------------------------------------------------------------------------------------------------------------------------------------------------------------------------------------------------------------|
| IV-1       | M   | 11                                   | 1.0               | normal       | non-progressive problems with night vision since childhood | normal                                                                          | full                              | marked loss of rod ERG responses, tested by dim blue flashes in the dark adapted state, absence of a waves                                                                                                                                                                                                                                        |
| III-12     | F   | 31                                   | 1.0               | normal       | non-progressive problems with night vision since childhood | normal                                                                          | full                              | marked loss of rod ERG responses, tested by dim blue flashes in the dark adapted state, absence of a waves                                                                                                                                                                                                                                        |
| III-10     | F   | 32                                   | 1.0               | normal       | non-progressive problems with night vision since childhood | normal                                                                          | full                              | marked loss of rod ERG responses, tested by dim blue flashes in the dark adapted state, absence of a waves                                                                                                                                                                                                                                        |
| III-9      | F   | 33                                   | 1.0               | normal       | non-progressive problems with night vision since childhood | normal                                                                          | full                              | marked loss of rod ERG responses, tested by dim blue flashes in the dark adapted state, absence of a waves                                                                                                                                                                                                                                        |
| III-6      | M   | 38                                   | 1.0               | normal       | non-progressive problems with night vision since childhood | pigment group formation in periphery                                            | constricted                       | marked loss of rod ERG responses, tested by dim blue flashes in the dark adapted state, absence of a waves, absence of normal amplitude of cone response to 30Hz flicker                                                                                                                                                                          |
| II-3       | M   | 63                                   | 1.0               | normal       | non-progressive problems with night vision since childhood | some pigment group formations, minimal atrophy, minimally attenuated arterioles | minimally constricted             | marked loss of rod ERG responses, tested by dim blue flashes in the dark adapted state, absence of a waves                                                                                                                                                                                                                                        |
| II-2       | M   | 64                                   | 1.0               | normal       | non-progressive problems with night vision since childhood | pigment group formation in periphery                                            | constricted                       | marked loss of rod ERG responses, tested by dim blue flashes in the dark adapted state, absence of a waves, absence of normal amplitude of cone response to 30Hz flicker, absence of normal cone response to single flashes, light adopted, remaining small responses had normal waveform and timing, there were fewer cones but functioning well |

**Abbreviations:** M- male, F – female, BCVA – best corrected visual acuity, BE – both eyes, ERG – Electroretinography

1. Sieving, P.A.; Richards, J.E.; Naarendorp, F.; Bingham, E.L.; Scott, K.; Alpern, M. Dark-light: model for nightblindness from the human rhodopsin Gly-90-->Asp mutation. *Proceedings of the National Academy of Sciences of the United States of America* **1995**, 92, 880-884, doi:10.1073/pnas.92.3.880.
